# Supplementary material
Source: PubMed Central journal article supplement (PMC3055704)
Supplement: 97320630005234S1.pdf [file 97320630005234S1.pdf]

### Supplementary material:

**Table 1:** List of the computer programs with their URLs.

| Program                | Version | URL                                                                                         |
|------------------------|---------|---------------------------------------------------------------------------------------------|
| Decrease Redundancy    | N/A     | <a href="http://www.expasy.org/tools/redundancy">http://www.expasy.org/tools/redundancy</a> |
| cd-hit                 | 3.1.1   | <a href="http://www.bioinformatics.org/cd-hit">http://www.bioinformatics.org/cd-hit</a>     |
| Pisces                 | N/A     | <a href="http://dunbrack.fccc.edu/PISCES.php">http://dunbrack.fccc.edu/PISCES.php</a>       |
| BlastClust (BLAST)     | 2.2.16  | <a href="http://blast.ncbi.nlm.nih.gov">http://blast.ncbi.nlm.nih.gov</a>                   |
| SkipRedundant (EMBOSS) | 6.2.0   | <a href="http://emboss.sourceforge.net">http://emboss.sourceforge.net</a>                   |

**Table 2:** Summary information on the datasets (nres indicates the number of residues).

| Dataset name | Dataset content                        |
|--------------|----------------------------------------|
| D_100_0      | 100 sequences with nres ≤ 100          |
| D_100_100    | 100 sequences with 100 < nres ≤ 200    |
| D_100_200    | 100 sequences with 200 < nres ≤ 300    |
| D_100_300    | 100 sequences with 300 < nres ≤ 400    |
| D_100_400    | 100 sequences with 400 < nres ≤ 500    |
| D_100_500    | 100 sequences with 500 < nres ≤ 600    |
| D_100_600    | 100 sequences with 600 < nres ≤ 700    |
| D_100_700    | 100 sequences with 700 < nres ≤ 800    |
| D_100_800    | 100 sequences with 800 < nres ≤ 900    |
| D_100_900    | 100 sequences with 900 < nres ≤ 1000   |
| D_100_1000   | 100 sequences with nres > 1000         |
|              |                                        |
| D_1000_0     | 1000 sequences with nres ≤ 100         |
| D_1000_100   | 1000 sequences with 100 < nres ≤ 200   |
| D_1000_200   | 1000 sequences with 200 < nres ≤ 300   |
| D_1000_300   | 1000 sequences with 300 < nres ≤ 400   |
| D_1000_400   | 1000 sequences with 400 < nres ≤ 500   |
| D_1000_500   | 1000 sequences with 500 < nres ≤ 600   |
| D_1000_600   | 1000 sequences with 600 < nres ≤ 700   |
| D_1000_700   | 1000 sequences with 700 < nres ≤ 800   |
| D_1000_800   | 1000 sequences with 800 < nres ≤ 900   |
| D_1000_900   | 1000 sequences with 900 < nres ≤ 1000  |
| D_1000_1000  | 1000 sequences with nres > 1000        |
|              |                                        |
| D_10000_0    | 10000 sequences with nres ≤ 100        |
| D_10000_100  | 10000 sequences with 100 < nres ≤ 200  |
| D_10000_200  | 10000 sequences with 200 < nres ≤ 300  |
| D_10000_300  | 10000 sequences with 300 < nres ≤ 400  |
| D_10000_400  | 10000 sequences with 400 < nres ≤ 500  |
| D_10000_500  | 10000 sequences with 500 < nres ≤ 600  |
| D_10000_600  | 10000 sequences with 600 < nres ≤ 700  |
| D_10000_700  | 10000 sequences with 700 < nres ≤ 800  |
| D_10000_800  | 10000 sequences with 800 < nres ≤ 900  |
| D_10000_900  | 10000 sequences with 900 < nres ≤ 1000 |
| D_10000_1000 | 10000 sequences with nres > 1000       |

**Table 3:** The main features of the different computer programs that were used.

| Program name        | Stand alone (OS)     | % sequence identity threshold | Output is dependent on the input order | Output format                |
|---------------------|----------------------|-------------------------------|----------------------------------------|------------------------------|
| Decrease Redundancy | No                   | 0 – 100 (any value)           | Yes                                    | FASTA                        |
| cd-hit              | Yes (Linux, Windows) | 40 – 100 (any value)          | Yes                                    | FASTA                        |
| Pisces              | Yes (Linux)          | 5 - 100 (any value)           | No                                     | List of identification codes |
| BlastClust          | Yes (Linux, Windows) | 0 – 100 (any value)           | No                                     | List of identification codes |
| SkipRedundant       | Yes (Linux)          | 0 – 100 (any value)           | Yes                                    | FASTA                        |

**Table 4:** The percentage of sequences found in the output relative to the input (Ptot). The thresholds of percentage of sequence identity are indicated as 'Max PID'. These data are the averages of the results obtained with all datasets.

| Program             | Max PID 40% | Max PID 50% | Max PID 75% | Max PID 90% |
|---------------------|-------------|-------------|-------------|-------------|
| Decrease redundancy | Ptot = 95%  | Ptot = 96%  | Ptot = 97 % | Ptot = 99%  |
| cd-hit              | Ptot = 88%  | Ptot = 91%  | Ptot = 94%  | Ptot = 98%  |
| Pisces              | Ptot = 88%  | Ptot = 91%  | Ptot = 95 % | Ptot = 98 % |
| BlastClust          | Ptot = 89 % | Ptot = 91%  | Ptot = 94%  | Ptot = 98 % |
| SkipRedundant       | Ptot = - *% | Ptot = -*%  | Ptot = 60%  | Ptot = 68%  |

\* Despite several attempts, the program reported results containing few clusters which were not further analyzed.

**Table 5:** Average overlap (standard deviation) between the outputs of different programs observed at different thresholds of sequence identity - Max PID. Averages and standard deviations were computed by using all the data sets.

| Max PID 40%         | Decrease redundancy | cd-hit  | Pisces  | BlastClust | Skip Redundant |
|---------------------|---------------------|---------|---------|------------|----------------|
| Decrease redundancy | 100%                | 88% (6) | 89% (5) | 89% (5)    | N/A            |
| cd-hit              |                     | 100%    | 95% (2) | 95% (3)    | N/A            |
| Pisces              |                     |         | 100%    | 95% (3)    | N/A            |
| BlastClust          |                     |         |         | 100%       | N/A            |
| Skip Redundant      | N/A                 | N/A     | N/A     | N/A        | N/A            |
| Max PID 50%         | Decrease redundancy | cd-hit  | Pisces  | BlastClust | Skip Redundant |
| Decrease redundancy | 100%                | 89% (5) | 90% (5) | 90% (3)    | N/A            |
| cd-hit              |                     | 100%    | 96% (2) | 94% (1)    | N/A            |
| Pisces              |                     |         | 100%    | 97% (1)    | N/A            |
| BlastClust          |                     |         |         | 100%       | N/A            |
| Skip Redundant      |                     |         |         |            | N/A            |
| Max PID 75%         | Decrease redundancy | cd-hit  | Pisces  | BlastClust | Skip Redundant |
| Decrease redundancy | 100%                | 90% (4) | 90% (4) | 92% (4)    | 91% (5)        |
| cd-hit              |                     | 100%    | 96% (1) | 95% (2)    | 99% (1)        |
| Pisces              |                     |         | 100%    | 98% (1)    | 97% (2)        |
| BlastClust          |                     |         |         | 100%       | 97% (2)        |
| Skip Redundant      |                     |         |         |            | 100%           |
| Max PID 90%         | Decrease redundancy | cd-hit  | Pisces  | BlastClust | Skip Redundant |
| Decrease redundancy | 100%                | 92% (4) | 92% (4) | 95% (3)    | 94% (4)        |
| cd-hit              |                     | 100%    | 95% (1) | 96% (1)    | 99% (1)        |
| Pisces              |                     |         | 100%    | 98% (1)    | 97% (1)        |
| BlastClust          |                     |         |         | 100%       | 97% (1)        |
| Skip Redundant      |                     |         |         |            | 100%           |
